# Supplementary material for: Electrostatic gating-driven transition from Schottky contact to p–n junction in moiré patterned Ars/Gra heterostructures
Source: Royal Society of Chemistry journal article supplement (doi:10.1039/d3tc02467a), 2023-01-01
Supplement: d3tc02467a1.pdf [file d3tc02467a1.pdf]

## Supporting Information

### **Electrostatic gating-driven transition from Schottky contact to *p-n* junction in moiré patterned Ars/Gra heterostructure**

Chunxiang Zhao<sup>1</sup>, Shuai Zhang<sup>2</sup>, Chunyao Niu<sup>3</sup>, Fei Wang<sup>3</sup>, Bin Cui<sup>4</sup>, Chong Li<sup>3\*</sup> and

Yu Jia<sup>3</sup>

<sup>1</sup>College of Physics and Electronic Engineering, Nanyang Normal University, Nanyang  
473061, China

<sup>2</sup>School of Physics and Engineering, Henan University of Science and Technology,  
Luoyang, 471023, China.

<sup>3</sup>School of Physics and Microelectronics, Zhengzhou University, Zhengzhou 450001,  
China

<sup>4</sup>School of Physics, State Key Laboratory of Crystal Materials, Shandong University,  
Jinan 250100, China

Corresponding author: [lichong@zzu.edu.cn](mailto:lichong@zzu.edu.cn)

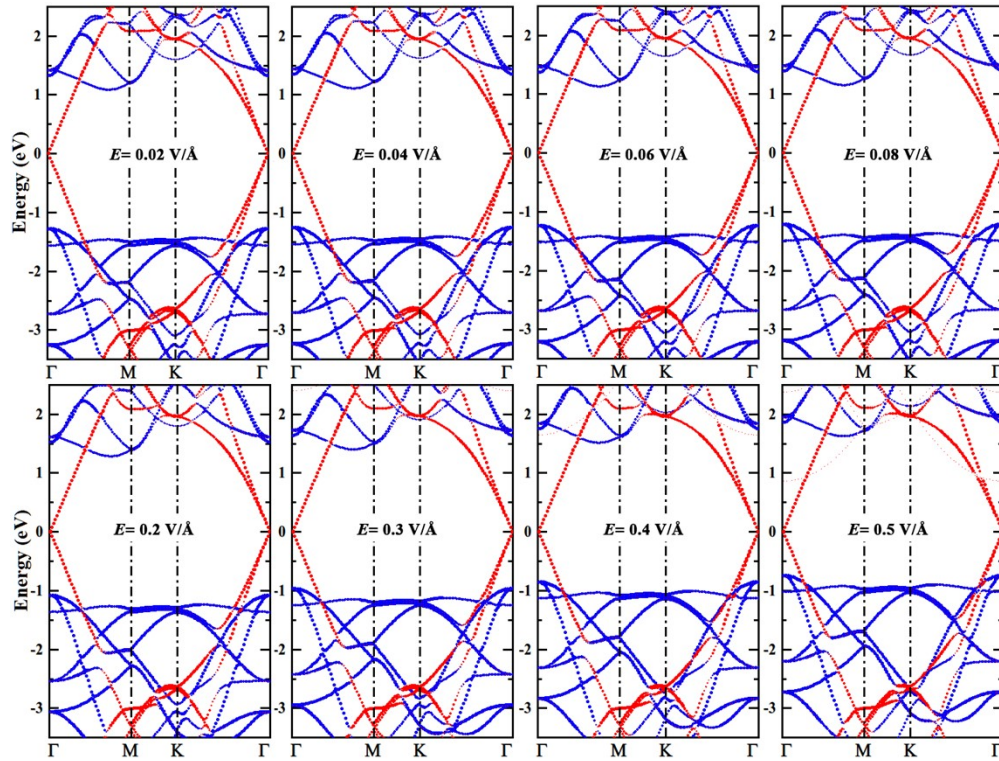

**Fig. S1.** The influence of electronic on projected bands of ordered stacking (3×3)-(2×2) Ars/Gra heterostructure. As the electric field increases gradually from 0.2 to 0.50 V/Å, the corresponding shift of the Dirac point referred as Fermi level can be clearly identified. The Fermi level is set to zero.

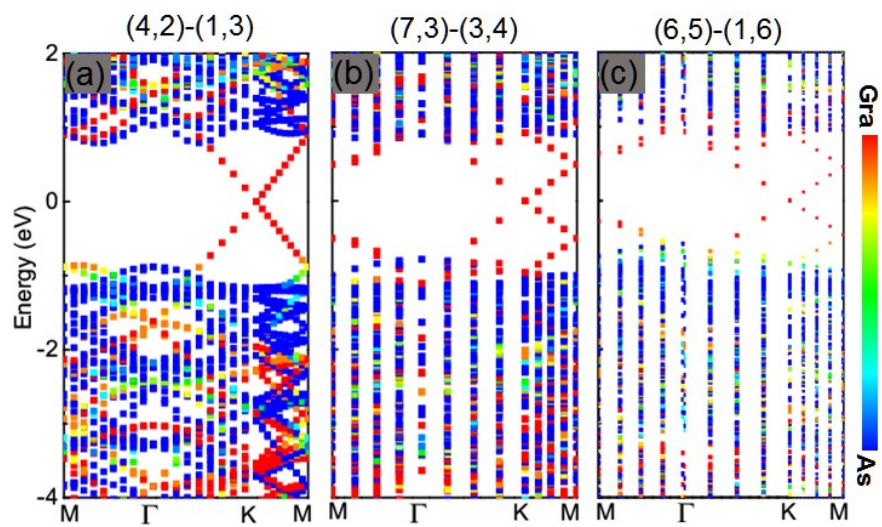

**Fig. S2.** Calculated the projected bands of three different Moiré structures using PBE functional.

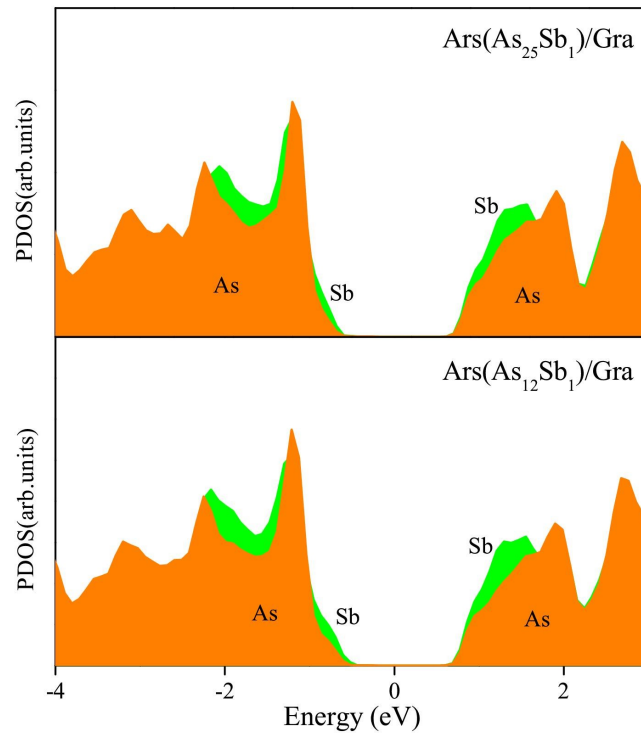

**Fig. S3.** The influence of doping concentration of Sb atom on the PDOS of moiré patterned Ars/Gra heterostructure, upper low concentration and lower high concentration. We clearly see that the impurity bands becomes more abundant and shift higher above the VBM. The Fermi level is set to zero.

**Table SI.** listed the binding energy  $E_b$  (mev/Å<sup>2</sup>), lattice constants  $a$  (Å), number of atoms ( $n$ ), twisted angles  $\theta$  (°) and lattice mismatch  $LM$  (%) of ordered stacking and different Moiré patterned Ars/Gra van de Waals heterostructures.

|          | Ordered stacking | Moiré patterns |                |                |
|----------|------------------|----------------|----------------|----------------|
|          | (3×3)-(2×2)      | $M(4,2)-(1,3)$ | $M(7,3)-(3,4)$ | $M(6,5)-(1,6)$ |
| $E_b$    | -17.3            | -12.8          | -15.8          | -12.7          |
| $a$      | 7.404            | 13.059         | 21.936         | 23.646         |
| $n$      | 26               | 82             | 232            | 268            |
| $\theta$ | 0.00°            | 32.53°         | 8.59°          | 23.68°         |
| $LM$     | 2.59%            | 0.44%          | 0.007%         | 0.43%          |

**Table II.** Calculated the formation energy ( $E_f$ ) of different impurity and defects. The host  $M(4,2)-(1,3)$  Moiré patterned heterostructure is selected.

|                  | As-T                                                                              | As-H                                                                              | Gra                                                                               | inter                                                                              | Sub-1                                                                               | Sub-2                                                                               |
|------------------|-----------------------------------------------------------------------------------|-----------------------------------------------------------------------------------|-----------------------------------------------------------------------------------|------------------------------------------------------------------------------------|-------------------------------------------------------------------------------------|-------------------------------------------------------------------------------------|
| <i>structure</i> |  |  |  |  |  |  |
| $E_f$ (eV)       | -0.86                                                                             | -0.82                                                                             | -0.21                                                                             | -0.34                                                                              | 0.40                                                                                | 0.35                                                                                |
